# Supplementary material for: Harnessing microbial co-culture to increase the production of known secondary metabolites
Source: Royal Society of Chemistry journal article supplement (doi:10.1039/d4np00052h), 2025-01-01
Supplement: d4np00052h1.pdf [file d4np00052h1.pdf]

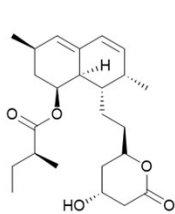

1: Monacolin K

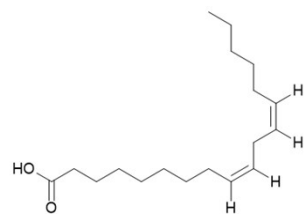

2: Linoleic acid

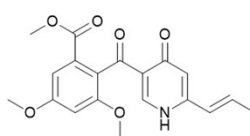

3: Penicidone C

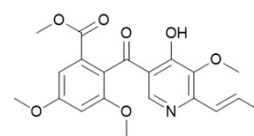

4: Penicidone D

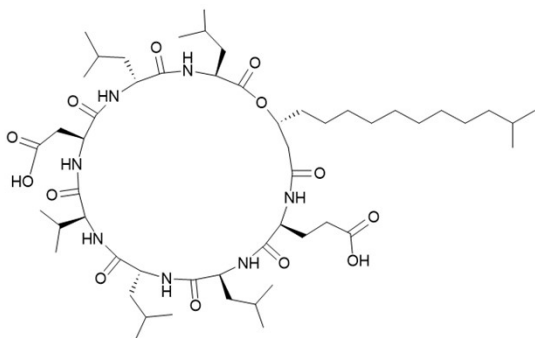

5: Surfactin

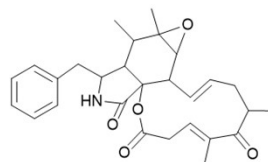

6: Rosellichalasin

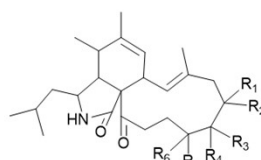

7: Aspochalasin E,  $R_1=R_3=R_5=H$ ,  $R_2=R_4=R_6=OH$

8: Aspochalasin P,  $R_1=R_2=R_3=H$ ,  $R_4=OH$ ,  $R_5=R_6=O$

9: Aspochalasin M,  $R_1=R_2=R_5=H$ ,  $R_3=R_4=O$ ,  $R_6=OH$

10: 19,20-Dihydro-aspochalasin D,  $R_1=R_2=R_3=R_5=H$ ,  $R_4=R_6=OH$

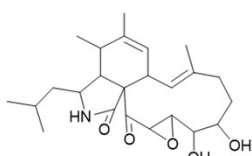

11: Aspochalasin H

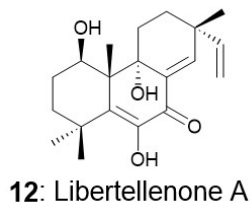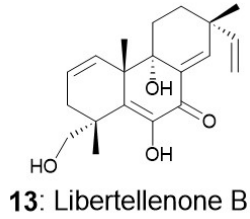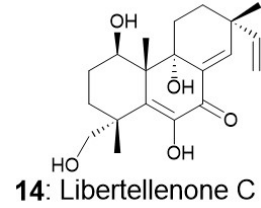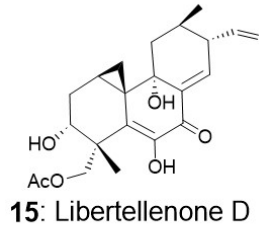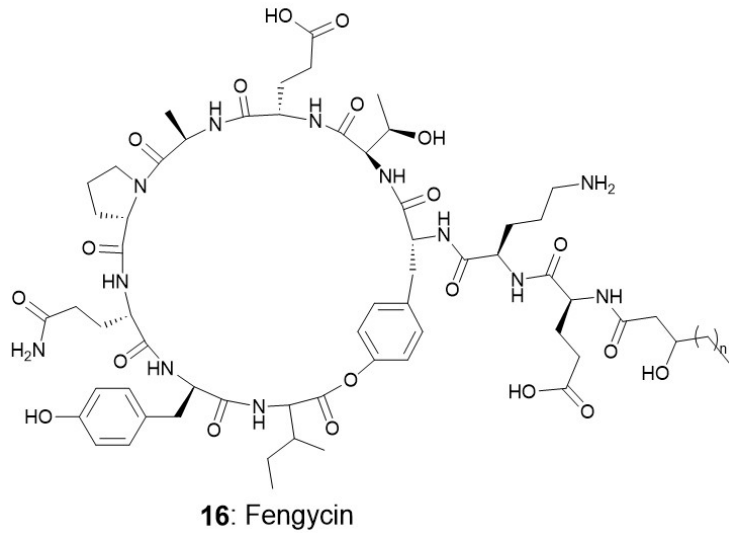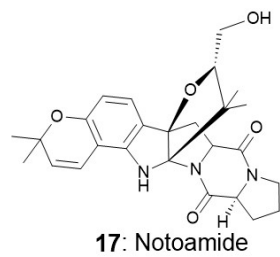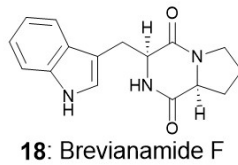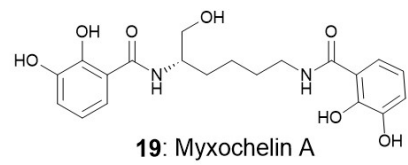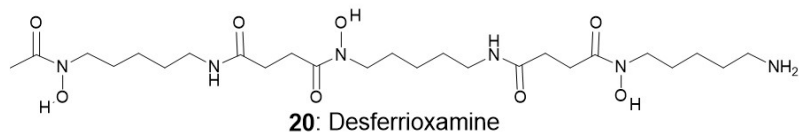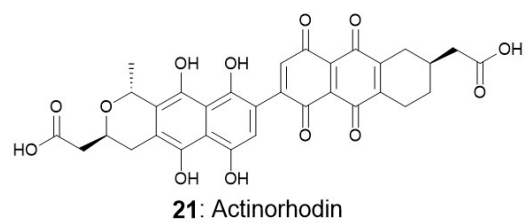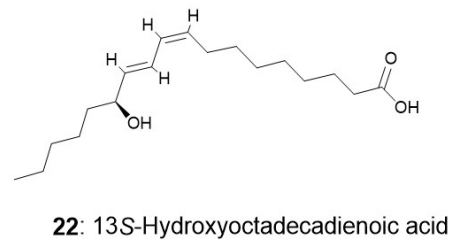

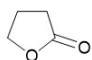

23:  $\gamma$ -butyrolactone

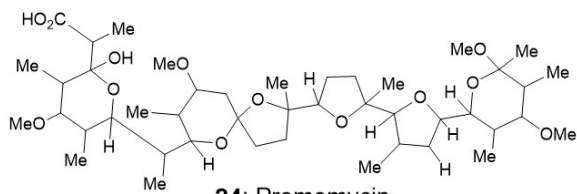

24: Promomycin

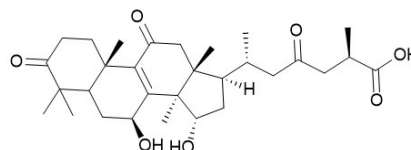

25: Ganoderic acid

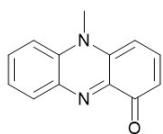

26: Pyocyanin

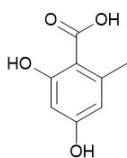

28: Orsellinic acid

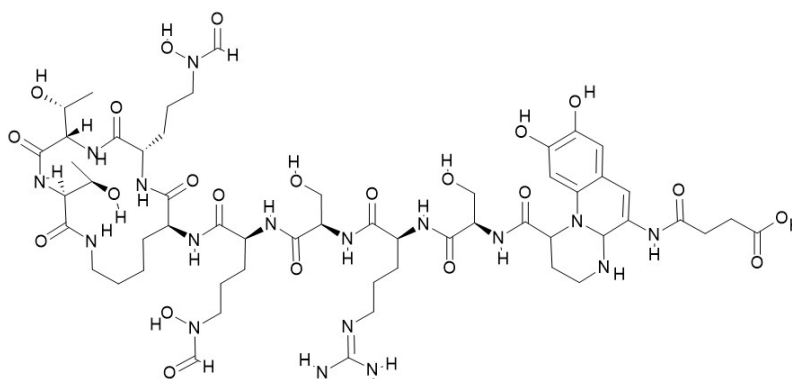

27: Pyoverdine

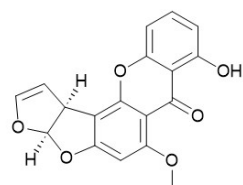

29: Sterigmatocystin

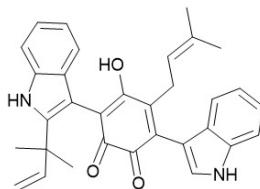

30: Terrequinone A

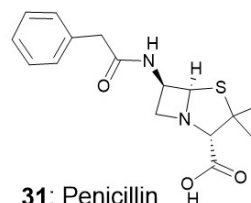

31: Penicillin

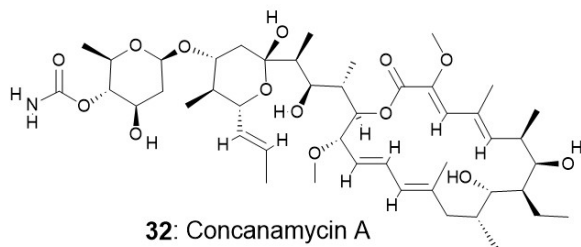

32: Concanamycin A

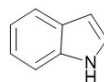

33: Indole

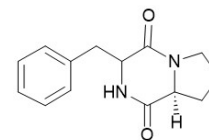

34: Diketopiperazine

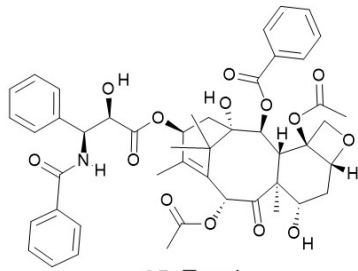

35: Taxol

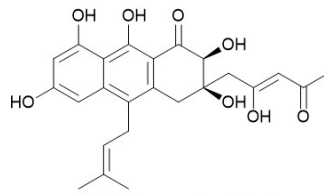

36: Neosartoricin B

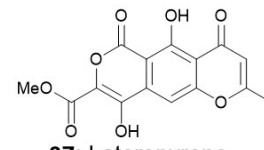

37: Lateropyrone

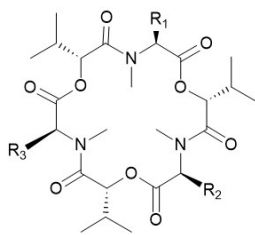

38: Enniatin B,  $R_1=R_2=R_3=CH(CH_3)_2$

39: Enniatin B<sub>1</sub>,  $R_1=R_2=CH(CH_3)_2$ ,  $R_3=CH(CH_3)CH_2CH_3$

40: Enniatin A<sub>1</sub>,  $R_1=R_2=CH(CH_3)CH_2CH_3$ ,  $R_3=CH(CH_3)_2$

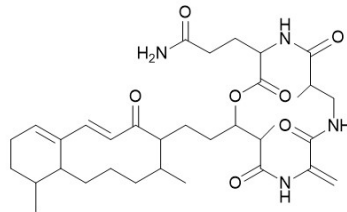

41: Fusaristatin A

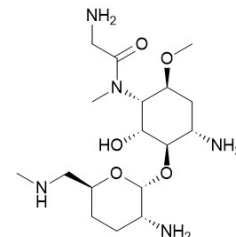

42: Istamycin A

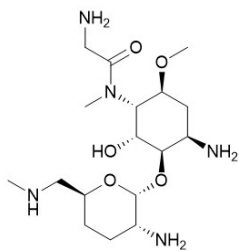

43: Istamycin B

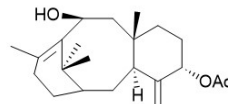

44: Oxidized taxane

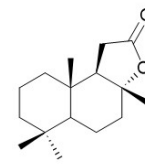

45: Sclareolide

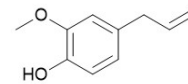

46: Eugenol

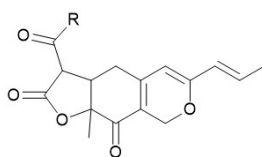

47: Monascin,  $R=C_5H_{11}$

48: Ankaflavin,  $R=C_7H_{15}$

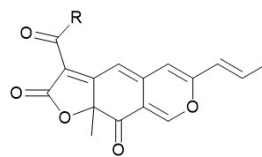

49: Rubropunctatin,  $R=C_5H_{11}$

50: Monascorubrin,  $R=C_7H_{15}$

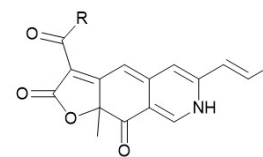

51: Rubropunctamine,  $R=C_5H_{11}$

52: Monascorubramine,  $R=C_7H_{15}$

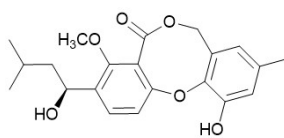

53: Penicillide

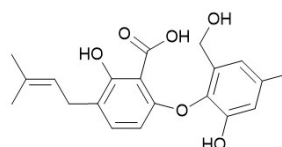

54: Secopenicillide C

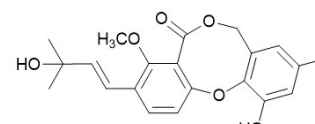

55: MC-141

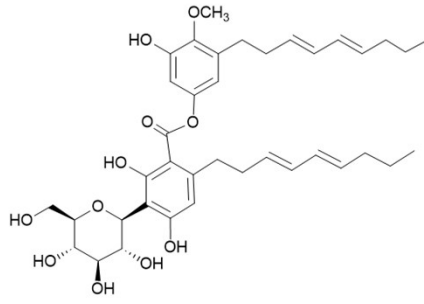

56: Stromemycin

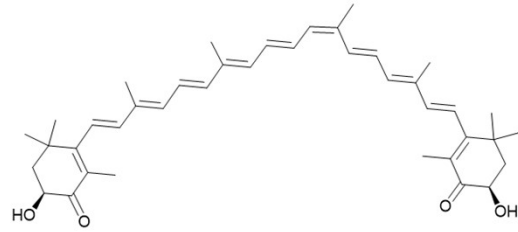

57: Astaxanthin

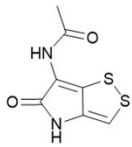

58: Holomycin

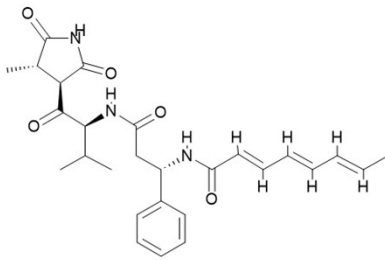

59: Andrimid

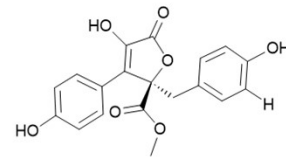

60: Butyrolactone II

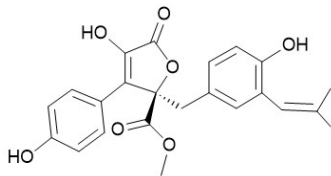

61: Butyrolactone I

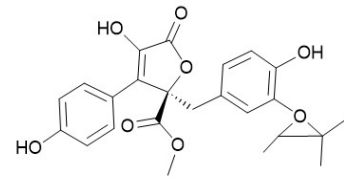

62: Butyrolactone III

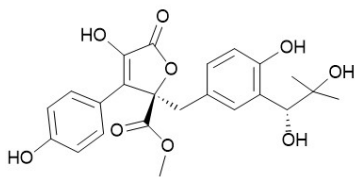

63: Butyrolactone VI

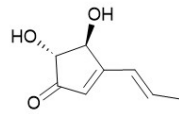

64: Terrein

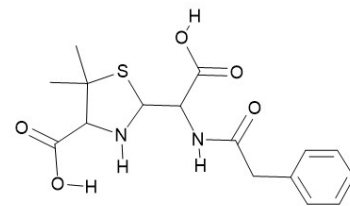

65: Benzylpenicilloic acid

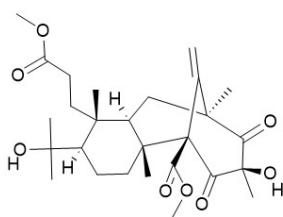

66: Preaustinoid D

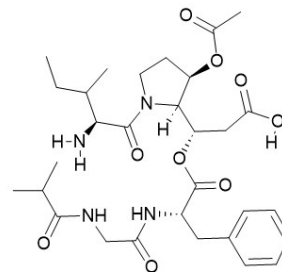

67: Rimosamide A

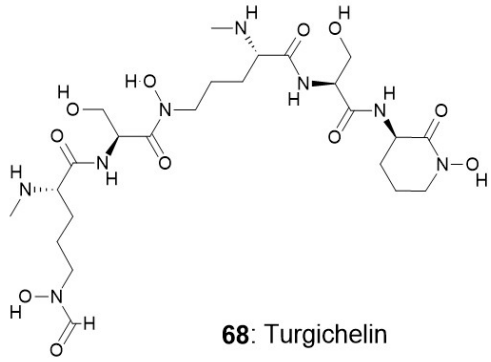

68: Turgichelin

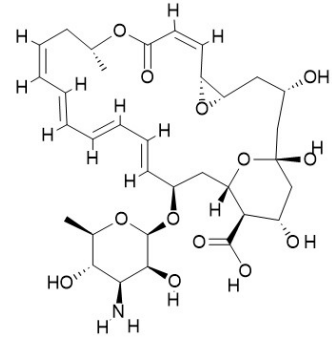

69: Natamycin
